# Supplementary material
Source: publisher figshare collection journal article supplement (https://future-science-group.figshare.com/ndownloader/files/34995847)
Supplement: Supplementary file 1 [file 34995847]

**Appendix 1**

PolyMAIC SAS code for Scenario A (narrow tolerances):

** ALD targets & matching tolerances **;

data ald_targ;

%let m1=55; * Mean age;

%let s1=6; * SD age;

%let mto1=0.005; * Mean age – matching tolerance;

%let sto1=0.005; * SD age – matching tolerance;

%let m2=0.65; * Proportion female;

%let mto2=0.0005; * Proportion female – matching tolerance;

run;

PROC OPTMODEL;

set OBS;* Number of IPD observations (N);

* Read in IPD.

x1 = min-max ‘age’ scaling.

x2 = min-max ‘female proportion’ scaling;

num AGE{OBS},SEXF{OBS},x1{OBS},x2{OBS};

read data IPD1 into OBS = [i] AGE SEXF x1 x2;

var b1 {j1 in 0..4}; * 4th order polynomial parameters for age;

var b2 {j1 in 1..1}; * 1st order polynomial parameter for sex;

* Weight calculations;

impvar w1 {i in OBS} = b1[0]+b1[1]*x1[i]+b1[2]*x1[i]**2+b1[3]*x1[i]**3+b1[4]*x1[i]**4; * Age;

impvar w2 {i in OBS} = b2[1]*x2[i]; * Proportion female;

impvar w {i in OBS} = exp(w1[i]+w2[i]); * Exp. combined weights;

impvar sw = sum {i in OBS} w[i]; * Sum of exp. combined weights;

* weighted means;

impvar wm1 = sum {i in OBS} AGE[i] *w[i] / sw; * age;

impvar wm2 = sum {i in OBS} SEXF[i]*w[i] / sw; * prop. female;

* weighted SDs (continuous characteristic only);

impvar wsd1 = sqrt(sum {i in OBS} w[i]*(AGE[i]-wm1)**2/(sw-1)); * age;

* Effective sample size (ESS) and max. weight;

impvar ess = sw**2 / sum {i in OBS} w[i]**2; * ESS;

impvar maxw = max {i in OBS} w[i]; * Maximum observed weight;

* Constraints;

con r1: sum {i in OBS} w[i] = card(OBS); * Weights sum to N;

* Constraints (weighted IPD vs. ALD tolerance within target);

con r2: abs(&m1-wm1) <= &mto1; * Mean age;

con r3: abs(&s1-wsd1) <= &sto1; * SD age;

con r4: abs(&m2-wm2) <= &mto2; * Proportion female;

*con r5: max {i in OBS} w[i] <= 5; * Max. weight restriction (optional);

* Find solution;

max objective = ess; * Maximise ESS according to above constraints;

solve with nlp / multistart=(maxstarts=20) seed=43113; *Non-linear optimization;

* Output matching performance;

print wm1 wsd1 wm2 ess maxw;

* Output IPWs;

create data ad.poly11 from [OBS] AGE SEXF w; * weights;

create data ad.poly11p from [OBS] b1 b2; * parameters for polynomial;

quit;

PolyMAIC SAS code for Scenario D (wide tolerances):

** ALD targets & matching tolerances **;

data t1;

%let m1=57.0; * Mean age;

%let s1=7.2; * SD age;

%let mto1=2; * Mean age - matching tolerance;

%let sto1=0.5; * SD age - matching tolerance;

%let m2=0.568; * Proportion female;

%let mto2=0.02; * Proportion female - matching tolerance;

%let m3=7.2; * Mean pain;

%let s3=1.3; * SD pain;

%let mto3=1; * Mean pain - matching tolerance;

%let sto3=0.5; * SD pain - matching tolerance;

%let m4=12.3; * Mean disease duration;

%let s4=6.4; * SD disease duration;

%let mto4=1; * Mean disease duration - matching tolerance;

%let sto4=1; * SD disease duration - matching tolerance;

%let m5=1.8; * Mean # prior events;

%let s5=1.9; * SD # prior events;

%let mto5=0.25; * Mean # prior events - matching tolerance;

%let sto5=0.25; * SD # prior events - matching tolerance;

run;

proc optmodel;

set OBS; * Number of IPD observations (N);

* Read in IPD.

x1 = min-max ‘age’ scaling

x2 = min-max ‘female proportion’ scaling

x3 = min-max 'pain' scaling

x4 = min-max 'disease duration' scaling

x5 = min=max '# prior events' scaling;

num AGE{OBS}, SEXF{OBS}, PAIN{OBS}, TIMED{OBS}, EPIS{OBS}, x1{OBS}, x2{OBS},x3{OBS},x4{OBS},x5{OBS};

read data d1 into OBS = [i] AGE SEXF PAIN TIMED EPIS x1 x2 x3 x4 x5;

var a1 {j1 in 0..4}; * 4th order polynomial parameters for age;

var a2 {j1 in 1..1}; * 1st order polynomial parameter for sex;

var a3 {j1 in 1..4}; * 4th order polynomial parameters for pain;

var a4 {j1 in 1..4}; * 4th order polynomial parameters for disease duration;

var a5 {j1 in 1..4}; * 4th order polynomial parameters for #prior events;

* Weight calculations;

impvar w1 {i in OBS} = a1[0]+a1[1]*x1[i]+a1[2]*x1[i]**2+a1[3]*x1[i]**3+a1[4]*x1[i]**4; * age;

impvar w2 {I in OBS} = a2[1]*x2[i]; * proportion female;

impvar w3 {i in OBS} = a3[1]*x3[i]+a3[2]*x3[i]**2+a3[3]*x3[i]**3+a3[4]*x3[i]**4; * pain;

impvar w4 {i in OBS} = a4[1]*x4[i]+a4[2]*x4[i]**2+a4[3]*x4[i]**3+a4[4]*x4[i]**4; * disease duration;

impvar w5 {i in OBS} = a5[1]*x5[i]+a5[2]*x5[i]**2+a5[3]*x5[i]**3+a5[4]*x5[i]**4; * # prior events;

impvar w {i in OBS} = exp(w1[i]+w2[i]+w3[i]+w4[i]+w5[i]); * Exp. combined weights;

impvar sw = sum {i in OBS} w[i]; * Sum of exp. combined weights;

* weighted means;

impvar wm1 = sum {i in OBS} AGE[i]*w[i] / sw; * age;

impvar wm2 = sum {i in OBS} SEXF[i]*w[i] / sw; * prop. female;

impvar wm3 = sum {I in OBS} PAIN[i]*w[i] / sw; * pain;

impvar wm4 = sum {I in OBS} TIMED[i]*w[i] / sw; * disease duration;

impvar wm5 = sum {i in OBS} EPIS[i]*w[i] / sw; * # prior events;

* weighted SDs (continuous characteristics only);

impvar wsd1 = sqrt(sum {I in OBS} w[i]*(AGE[i]-wm1)**2/(sw-1)); * age;

impvar wsd3 = sqrt(sum {i in OBS} w[i]*(PAIN[i]-wm3)**2/(sw-1)); * pain;

impvar wsd4 = sqrt(sum {i in OBS} w[i]*(TIMED[i]-wm4)**2/(sw-1)); * disease duration;

impvar wsd5 = sqrt(sum {i in OBS} w[i]*(EPIS[i]-wm5)**2/(sw-1)); * # prior events;

* Effective sample size (ESS) and max. weight;

impvar ess = sw**2 / sum {i in OBS} w[i]**2; * ESS;

impvar maxw = max {I in OBS} w[i]; * Maximum observed weight;

* Constraints;

con r1: sum {i in OBS} w[i] = card(OBS); * Weights sum to N;

* Constraints (weighted IPD vs. ALD tolerance within target);

con r2: abs(&m1-wm1)<=&mto1; * Mean age;

con r3: abs(&s1-wsd1)<=&sto1; * SD age;

con r4: abs(&m2-wm2)<=&mto2; * Pop. female;

con r5: abs(&m3-wm3)<=&mto3; * Mean pain;

con r6: abs(&s3-wsd3)<=&sto3; * SD pain;

con r7: abs(&m4-wm4)<=&mto4; * Mean disease duration;

con r8: abs(&s4-wsd4)<=&sto4; * SD disease duration;

con r9: abs(&m5-wm5)<=&mto5; * Mean # prior events;

con r10: abs(&s5-wsd5)<=&sto5; *SD # prior events;

con r11: max {i in OBS} w[i] <=10; * Max. weight restriction (optional);

* Find solution;

max objective = ess; * Maximise ESS according to above constraints;

solve with nlp / multistart=(maxstarts=50) seed=31211; * non-linear optimization;

* Output matching performance;

print wm1 wsd1 wm2 wm3 wsd3 wm4 wsd4 wm5 wsd5 ess maxw;

* Output IPWs;

create data ad.poly42 from [OBS] AGE SEXF PAIN TIMED EPIS w; * weights;

create data ad.poly42p from [OBS] a1 a2 a3 a4 a5; * parameters for polynomial;

quit;
